# Supplementary material
Source: PubMed Central journal article supplement (PMC7479956)
Supplement: advancesADV2020002642-suppl1.pdf [file advancesADV2020002642-suppl1.pdf]

SUPPLEMENTAL DATA

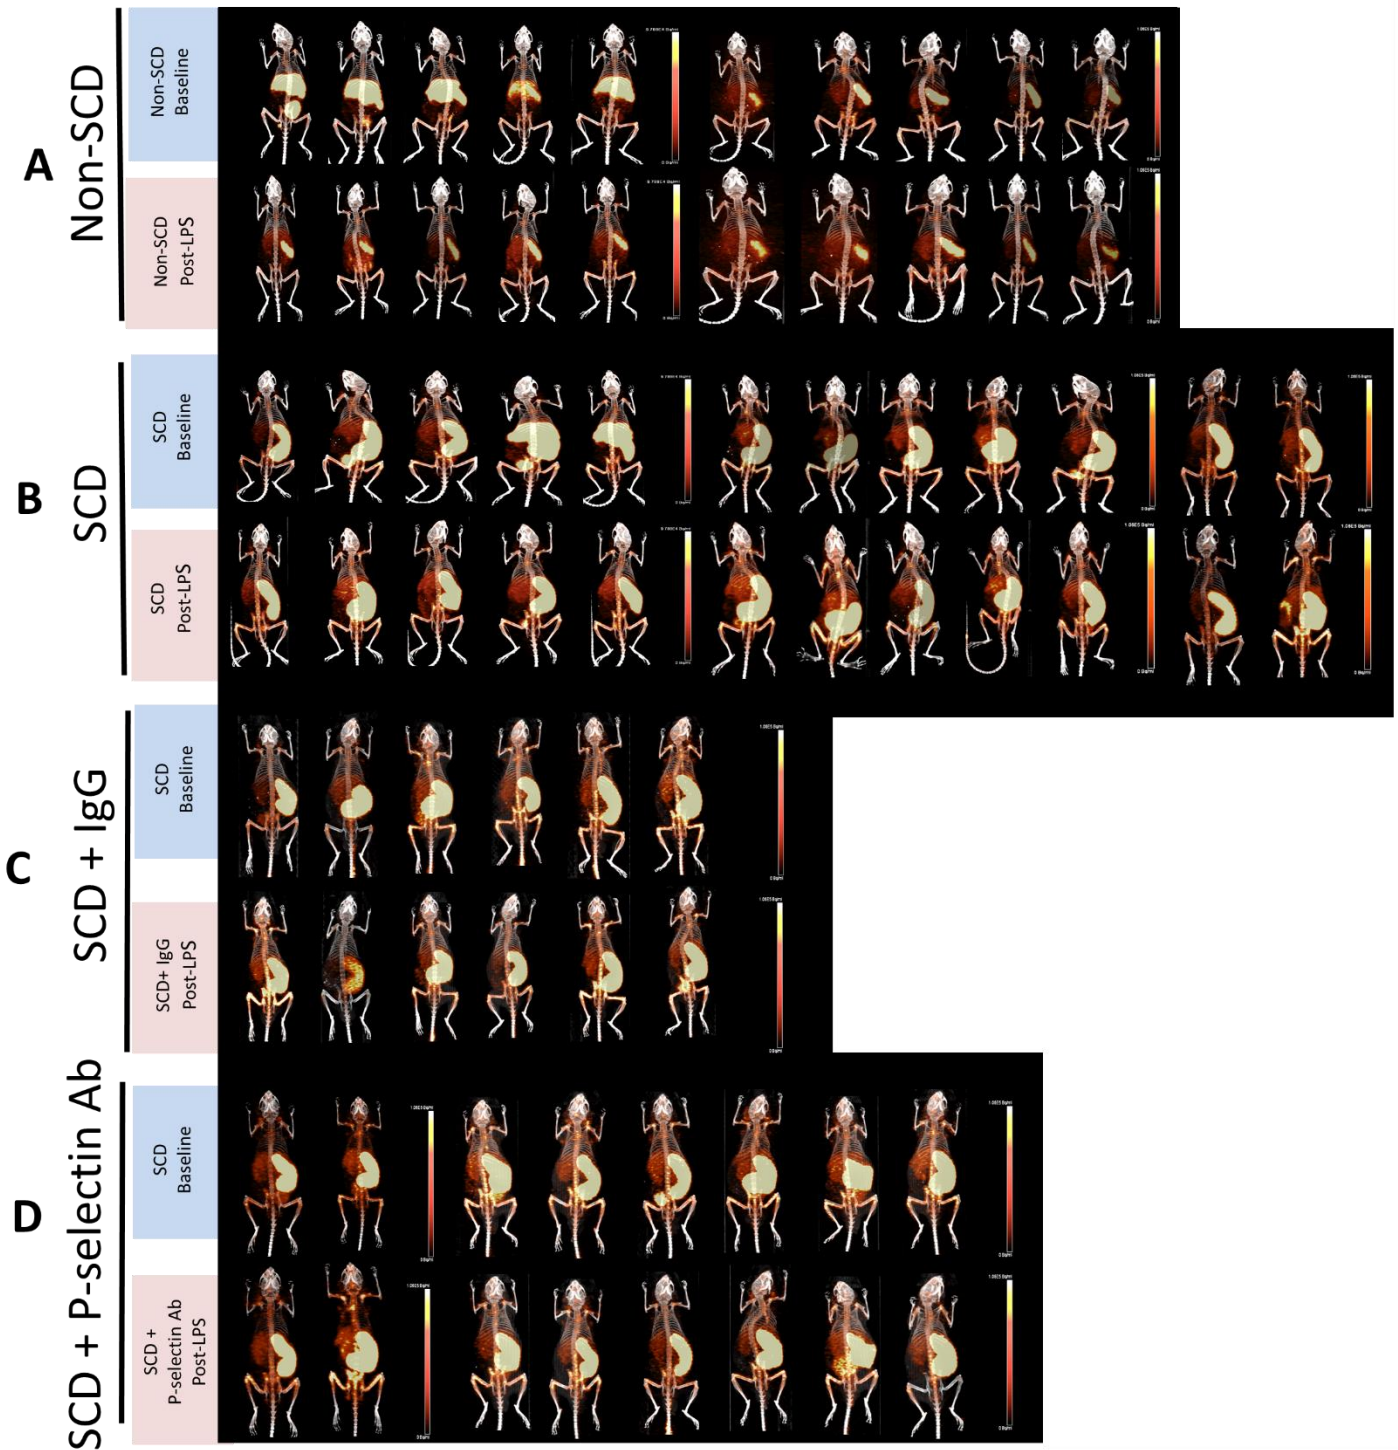

Supplemental Figure 1. PET/CT images of mice 24 h after injection of  $^{64}\text{Cu}$ -CB-TE1A1P-PEG<sub>4</sub>-LLP2A. Baseline images were acquired one week before LPS challenge. After one week,

mice were injected i.v. with LPS and  $^{64}\text{Cu}$ -LLP2A. **A)** Non-SCD mice **B)** SCD mice **C)** SCD mice were co-injected with IgG isotype control with LPS stimulation. **D)** SCD mice were co-injected with anti-P-selectin mAb with LPS stimulation.

**Supplemental Table 1. Peripheral blood counts at baseline and post-LPS**

| Mouse   | Co-LPS Treatment | Mice (#) | HGB (g/dL) |           | HCT (%)  |          | Platelets (10e9/L) |           | WBC (10e9/L) |           | Neutrophils (10e9/L) |           |
|---------|------------------|----------|------------|-----------|----------|----------|--------------------|-----------|--------------|-----------|----------------------|-----------|
|         |                  |          | Baseline   | Post-LPS  | Baseline | Post-LPS | Baseline           | Post-LPS  | Baseline     | Post-LPS  | Baseline             | Post-LPS  |
| Non-SCD | N/A              | 10*      | 9.0 ± 3.6  | 12 ± 1.9  | 29 ± 11  | 36 ± 5.8 | 510 ± 340          | 740 ± 290 | 8.8 ± 2.4    | 3.0 ± 1.9 | 2.1 ± 1.0            | 1.7 ± 1.2 |
| SCD     | N/A              | 12*      | 7.3 ± 2.7  | 9.5 ± 1.9 | 21 ± 6.8 | 26 ± 5.4 | 340 ± 180          | 470 ± 150 | 29 ± 16      | 38 ± 17   | 4.0 ± 3.2            | 11 ± 3.8  |
| SCD     | IgG Control      | 6        | 7.3 ± 3.0  | 9.6 ± 1.7 | 22 ± 9.0 | 27 ± 4.5 | 400 ± 160          | 560 ± 135 | 37 ± 15      | 28 ± 17   | 5.0 ± 3.7            | 8.0 ± 4.1 |
| SCD     | P-selectin Ab    | 8        | 8.7 ± 2.4  | 10 ± 1.3  | 26 ± 6.9 | 28 ± 3.7 | 690 ± 230          | 640 ± 109 | 33 ± 15      | 38 ± 15   | 7.2 ± 3.4            | 14 ± 5.6  |

Data presented as mean ± SD. \*One mouse had low sample volume for blood count.

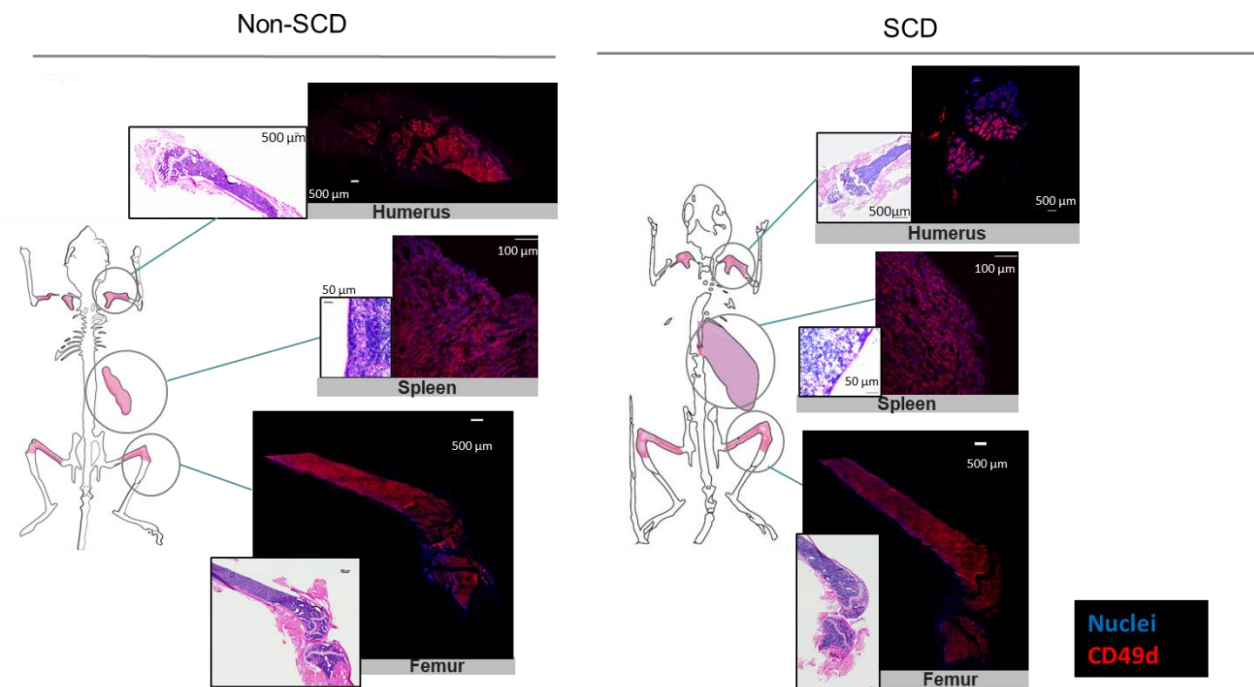

**Supplemental Figure 2. Histology and immunofluorescence images of the humeri, femurs, and spleen post-LPS in SCD and non-SCD mice.** CD49d signal is represented in red and DAPI-labeled nuclei are blue. Fluorescent bones were imaged by SIM Zeiss Axio Observer.Z1-inverted microscope with Apotome (Oslo, Norway) with a 10x 0.3 N.A. EC Plan-Neofluar objective, and spleens were imaged with a Nikon confocal with 20x air objective. H&E slides were imaged with a TissueGnostics microscope system (Vienna, Austria) with a 10x air objective.

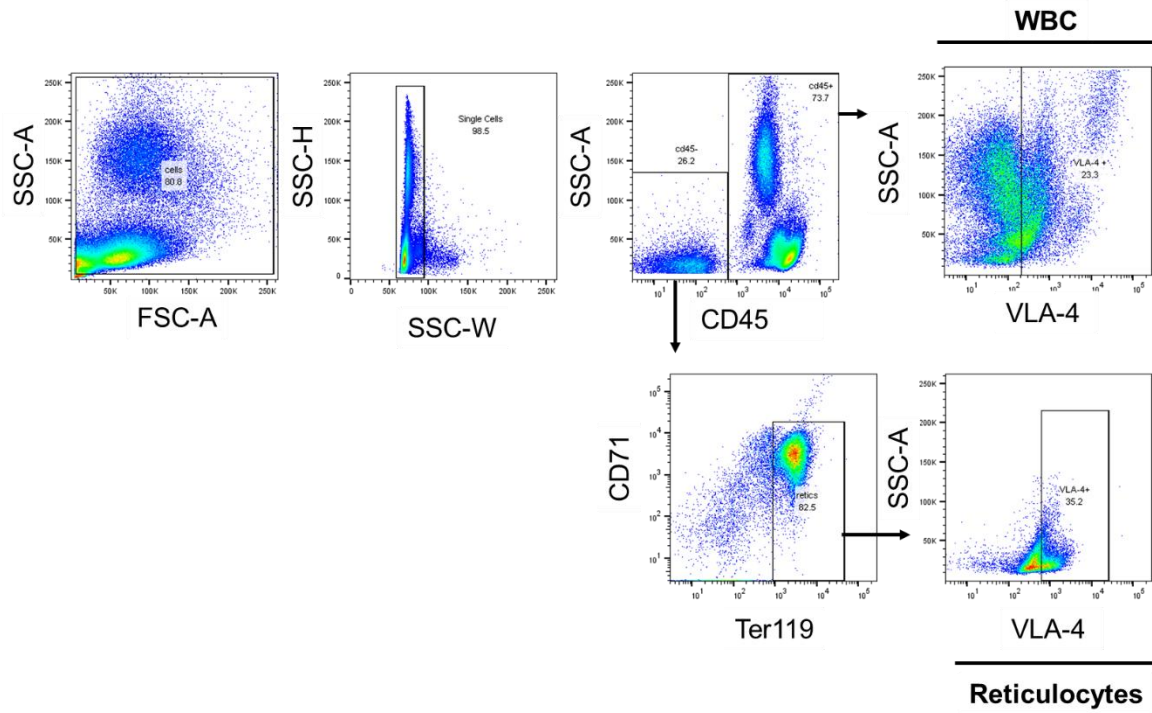

Supplemental Figure 3. Flow cytometry gating strategy for reticulocytes and WBC.
